# Supplementary material
Source: PubMed Central journal article supplement (PMC514463)
Supplement: pnas_101_33_12242__1.pdf [file pnas_101_33_12242__1.pdf]

## Supporting Text

### Construction of Strains and Vectors

The THY.AP4 yeast strain was derived from CEN.PK113-6B [*MATa ura3 leu2 trp1 HIS3 ADE2*]. First, the *HIS3* promoter region from -400 to -1 bp was replaced by a *lexA*-controlled promoter using PCR targeting (1). In the first PCR the KanMX cassette of plasmid pUG6 was flanked by regions complementary to the *HIS3* promoter and the beginning of the *lexA* promoter derived from the vector “LexAox5LacZ” that carries five *lexA* binding sites in front of the *lacZ* gene (2). In the second PCR the *lexA* promoter was amplified with short left and right regions complementary to the right border of the first PCR and the beginning of the *HIS3* gene respectively. PCR products were both used to transform CEN.PK113-6B, cells were selected for resistance to G418 and the KanMX cassette was removed with Cre-recombinase. Similar, the *ADE2* promoter region from -498 to -1 bp was replaced with the *lexA* promoter. Finally, the replacement of *trp1* by the *lexA*-promoter-*lacZ* cassette of LexAox5LacZ resulted in strain THY.AP4 [*MATa ura3 leu2 lexA::lacZ::trp1 lexA::HIS3 lexA::ADE2*]. The strain THY.AP5 [*MAT $\alpha$  URA3 leu2 trp1 his3 loxP::ade2*] was derived from CEN.PK113-17D [*MAT $\alpha$  URA3 leu2 trp1 his3 ADE2*] by replacing *ADE2* with KanMX cassette, which was subsequently removed with Cre-recombinase.

Linkers B1 and B2 were fused to construct all pSUGate plasmids (Fig. 7). For construction of pNXgate vector the plasmid pNubG-X (3) was cleaved with *PstI*, blunt-ended and cleaved with *SalI*. The KanMX cassette of pUG6 was flanked with *SalI*-B1 and B2-HA tag sequences by PCR, and the product was cleaved with *SalI* and inserted into the linear pNubG-X. For the construction of pXNgate vector the KanMX cassette and the NubG region of the vector pX-NubG (3) were flanked with *NdeI*-B1 and B2 sequence, and with B2 linker and HA tag-*PstI* sequences, respectively. The resulting *NdeI*-B1-KanMX-B2 and B2-NubG-HA-*PstI* fragments were cleaved with *NdeI/BamHI* and with *BamHI/PstI*, and co-inserted into *NdeI* and *PstI* sites of pX-NubG. The hemagglutinin (HA) tag of pNXgate and pXNgate was not detectable in any of the tested

NubG fusions (data not shown). pMetYCgate vector was derived from the CEN/ARS-based plasmid YCpHXT7-hsGLUT4-CubPLV (4) using *in vivo* cloning strategy (5). B1-KanMX-B2 cassette was flanked by regions complementary to the end of the *HXT7* promoter and the beginning of *Cub*, respectively. This PCR product was used to replace the *HXT7* gene of YCpHXT7-hsGLUT4-CubPLV. Subsequently, *HXT7* promoter was replaced by *MET25* promoter of the plasmid pGFP-C-FUS (6). For the construction of the plasmid pNubWT-2 the *NubWT* cDNA was amplified from pNubWT-GLUT1 (4) and the product was inserted into *XhoI* and *PstI* sites of pNubG-X.

### **$\beta$ -Galactosidase Activity Assays and Western Blot**

To measure  $\beta$ -galactosidase activity of lacZ with 5-bromo-4-chloro-3-indolyl  $\beta$ -D-galactoside (X-gal), diploid cells were grown on SD medium supplemented with adenine and histidine, and then covered with a X-gal-agarose (0.5% agarose, 0.5 M phosphate buffer, pH 7.0, 0.1% SDS, 0.8 mg/ml X-gal, Sigma). Blue staining was recorded for 1-24 h. For liquid  $\beta$ -galactosidase assays with ONPG cell extracts were prepared (7), and assays were performed using 100  $\mu$ l of the extracts (8). For Western blot analysis, each probe corresponded to  $1 \times 10^7$  cells (9). Proteins were stained with monoclonal mouse anti-VP16-(1-21) antibodies (Santa Cruz Biotechnology) and visualized with horseradish peroxidase (HRP)-coupled anti-mouse antibodies (Sigma) and SuperSignal West HRP-detection kit (Pierce).

### **Construction of the Sorted X-NubG Collection and CubPLV Bait Fusions**

Eighty-four *Arabidopsis thaliana* ORFs were amplified by RT-PCR as described in *Cloning into pSUGate Vectors*, the list of ORFs and their corresponding accession numbers are given in Table 1. The ORFs were cloned by *in vivo* recombination using double-digested *SmaI*+*EcoRI* pXNgate vector (100 ng) and purified PCR fragments (300-900 ng) corresponding to each of the selected *A. thaliana* ORFs to transform the yeast strain THY.AP5 (MAT $\alpha$ ). Transformation was carried out in a 96-well format using the lithium acetate procedure (10). After transformation, cells were plated on SC media

minus Trp and incubated at 28°C for 3-4 days. About 20 colonies from each transformation plate were transferred on solid SC media minus Trp with and without G418 and incubated for another 2-3 days. The G418-sensitive clones were pooled, cultured in liquid medium minus Trp and manually arrayed into individual wells on 96-well MicroWell plates (Nalge Nunc International) containing liquid SC minus Trp and supplemented with 15% glycerol. The microassay plates were stored at -80°C for further use. CubPLV baits were constructed via *in vivo* cloning by transforming THY.AP4 (MATa) with double-digested *PstI/HindIII* metYCGate and the PCR fragments as described for the sorted X-NubG collection and selecting transformants on appropriate SC media minus Leu and Ura. About 20 G418-sensitive colonies from each transformation were pooled, cultured in liquid SC minus Leu and Ura, and the cultures were stored with 15% glycerol at -80°C.

### **96-Well Array Screening**

X-NubG and Y-CubPLV prey and bait cells were mated on solid YPD for 2-3 days at 28°C transferring 3 µl of an overnight culture of the *MATα* strain expressing a X-NubG onto OmniTray plates (Nalge Nunc) using a 96-pin Replicating System (Nalge Nunc), and then pinning 3 µl of a specific Y-CubPLV bait culture (*MATa*) onto the same positions. Diploids were selected by transferring with the replicating tool to liquid medium without leucine and tryptophan, followed by 2-3 days of further growth. Diploids containing potential interactors were selected for 4-6 days at 28°C on medium minus Leu, Trp, His, Ade, and Ura, and supplemented with different concentrations of methionine (0, 0.1, 0.4, and 1 mM) to titrate the expression of the Y-CubPLV fusion under the control of the *MET25* promoter. Growth of diploids was monitored by measuring the absorbance at 595 nm in a microplate reader (model 550, Bio-Rad) for 3-9 days. Positive interactor diploids typically showed an OD<sub>595</sub> higher than 0.8 whereas negative interactors displayed an OD similar to the blank.

1. Güldener, U., Heck, S., Fiedler, T., Beinhauer, J. & Hegemann, J. H. (1996) *Nucleic Acids Res.* **24**, 2519-2524.

2. Ruden, D. M., Ma, J., Li, Y., Wood, K. & Ptashne, M. (1991) *Nature* **350**, 250-252.
3. Stagljar, I., Korostensky, C., Johnsson, N. & te Heesen, S. (1998) *Proc. Natl. Acad. Sci. USA* **95**, 5187-5192.
4. Dlugai, S. (2003) Ph.D. thesis (Heinrich-Heine-Universität, Düsseldorf).
5. Fusco, C., Guidotti, E. & Zervos, A. S. (1999) *Yeast* **15**, 715-720.
6. Niedenthal, R. K., Riles, L., Johnston, M. & Hegemann, J. H. (1996) *Yeast* **12**, 773-786.
7. Reinders, A., Schulze, W., Kühn, C., Barker, L., Schulz, A., Ward, J. M. & Frommer, W. B. (2002) *Plant Cell* **14**, 1567-1577.
8. Miller, J. H. (1972) *Experiments in Molecular Genetics* (Cold Spring Harbor Laboratory Press, Plainview, NY).
9. Volland, C., Urban-Grimal, D., Géraud, G. & Haguenaer-Tsapis, R. (1994) *J. Biol. Chem.* **269**, 9833-9841.
10. Sherman, F., Fink, G. R. & Hicks, J. B. (1986) *Methods in Yeast Genetics* (Cold Spring Harbor Laboratory Press, Plainview, NY).
