# Supplementary material
Source: PubMed Central journal article supplement (PMC514463)

A

linker B1

*attB1*  
**acaagtttgtaaaaaagcaggct**ctccaaccaccatg  
T S L Y K K A G S P T T Met

linker B2

*attB2*  
**taccagctttcttgtacaaagtggf**gggtgggtggcgga  
Y P A F L Y K V V G G G G  
  
tccggtggaggtggatca  
S G G G G S

B

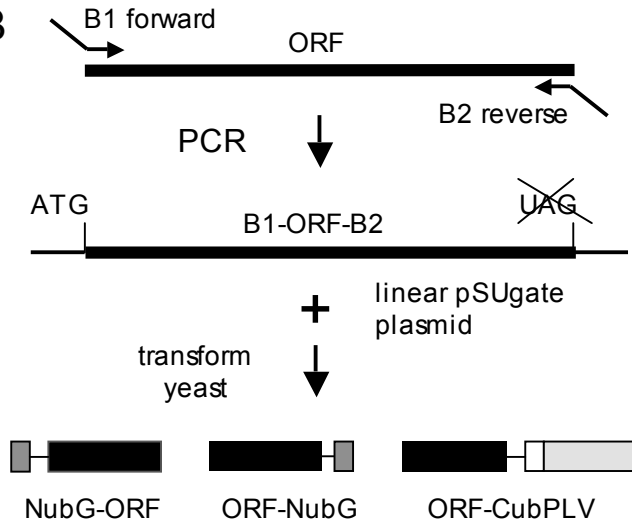

Supplement: pnas_101_33_12242__3.pdf [file pnas_101_33_12242__3.pdf]
