# Supplementary material
Source: PubMed Central journal article supplement (PMC514463)
Supplement: pnas_101_33_12242__7.pdf [file pnas_101_33_12242__7.pdf]

|            |        | <b>Cub</b> |       |      |                     |
|------------|--------|------------|-------|------|---------------------|
|            |        | KAT1       | AtKC1 | AKT1 |                     |
| <b>Nub</b> | AKT1   |            |       |      | <b>3 days, 28°C</b> |
|            | AtKC1  |            |       |      |                     |
|            | NRT2.7 |            |       |      |                     |
|            | PUP11  |            |       |      |                     |
|            | KAT1   |            |       |      |                     |
|            | Rop1   |            | 0     |      |                     |
|            | NubWT  | 0          | 0     |      |                     |
|            | NubG   |            |       |      |                     |
| <b>Nub</b> | AKT1   |            | 0     |      | <b>4 days, 28°C</b> |
|            | AtKC1  |            |       |      |                     |
|            | NRT2.7 |            |       |      |                     |
|            | PUP11  | 0          |       |      |                     |
|            | KAT1   |            |       |      |                     |
|            | Rop1   |            | 1000  |      |                     |
|            | NubWT  | 1000       | 400   |      |                     |
|            | NubG   |            |       |      |                     |
| <b>Nub</b> | AKT1   | 0          | 0     |      | <b>5 days, 28°C</b> |
|            | AtKC1  |            |       |      |                     |
|            | NRT2.7 |            | 0     |      |                     |
|            | PUP11  | 100        |       |      |                     |
|            | KAT1   | 0          |       |      |                     |
|            | Rop1   |            | 1000  |      |                     |
|            | NubWT  | 1000       | 1000  |      |                     |
|            | NubG   |            |       |      |                     |
| <b>Nub</b> | AKT1   | 0          | 0     |      | <b>6 days, 28°C</b> |
|            | AtKC1  |            |       |      |                     |
|            | NRT2.7 |            | 0     |      |                     |
|            | PUP11  | 100        |       |      |                     |
|            | KAT1   | 0          |       |      |                     |
|            | Rop1   |            | 1000  |      |                     |
|            | NubWT  | 1000       | 1000  | 0    |                     |
|            | NubG   |            |       |      |                     |
| <b>Nub</b> | AKT1   | 0          | 0     |      | <b>9 days, 28°C</b> |
|            | AtKC1  |            |       |      |                     |
|            | NRT2.7 |            | 0     |      |                     |
|            | PUP11  | 100        |       |      |                     |
|            | KAT1   | 0          |       |      |                     |
|            | Rop1   |            | 1000  |      |                     |
|            | NubWT  | 1000       | 1000  | 0    |                     |
|            | NubG   |            |       |      |                     |
