# Supplementary material
Source: PubMed Central journal article supplement (PMC514463)

**AKT1-C**

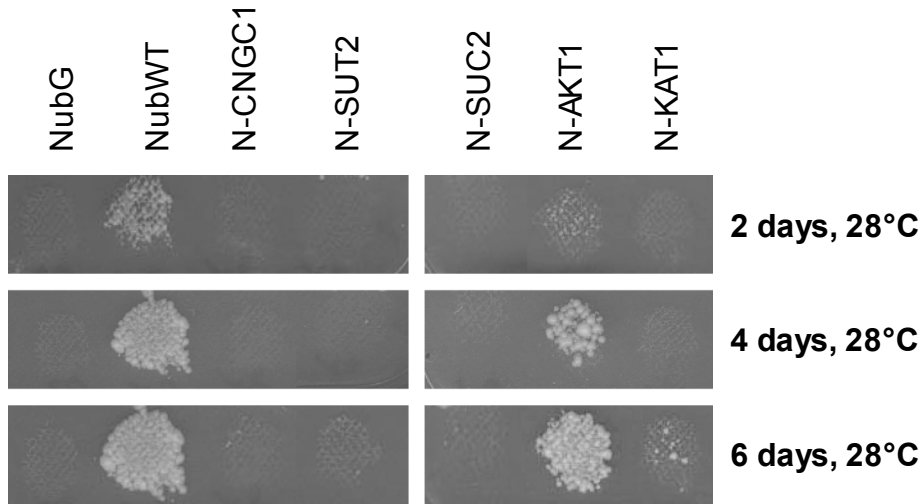

Supplement: pnas_101_33_12242__4.pdf [file pnas_101_33_12242__4.pdf]

**A**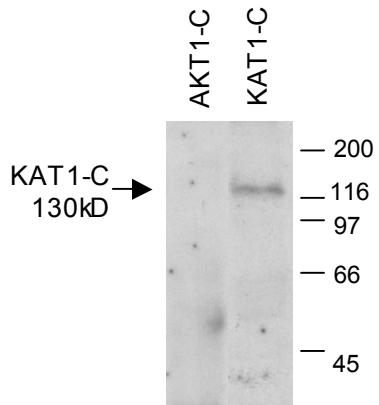**B**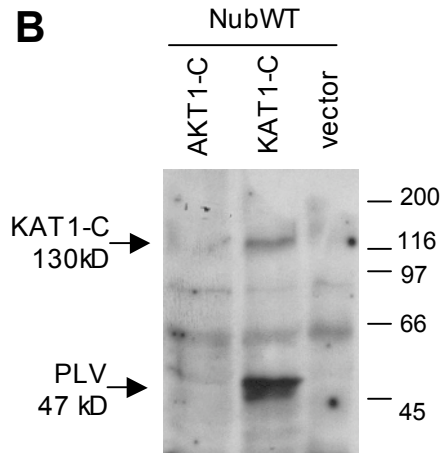

Supplement: pnas_101_33_12242__5.pdf [file pnas_101_33_12242__5.pdf]

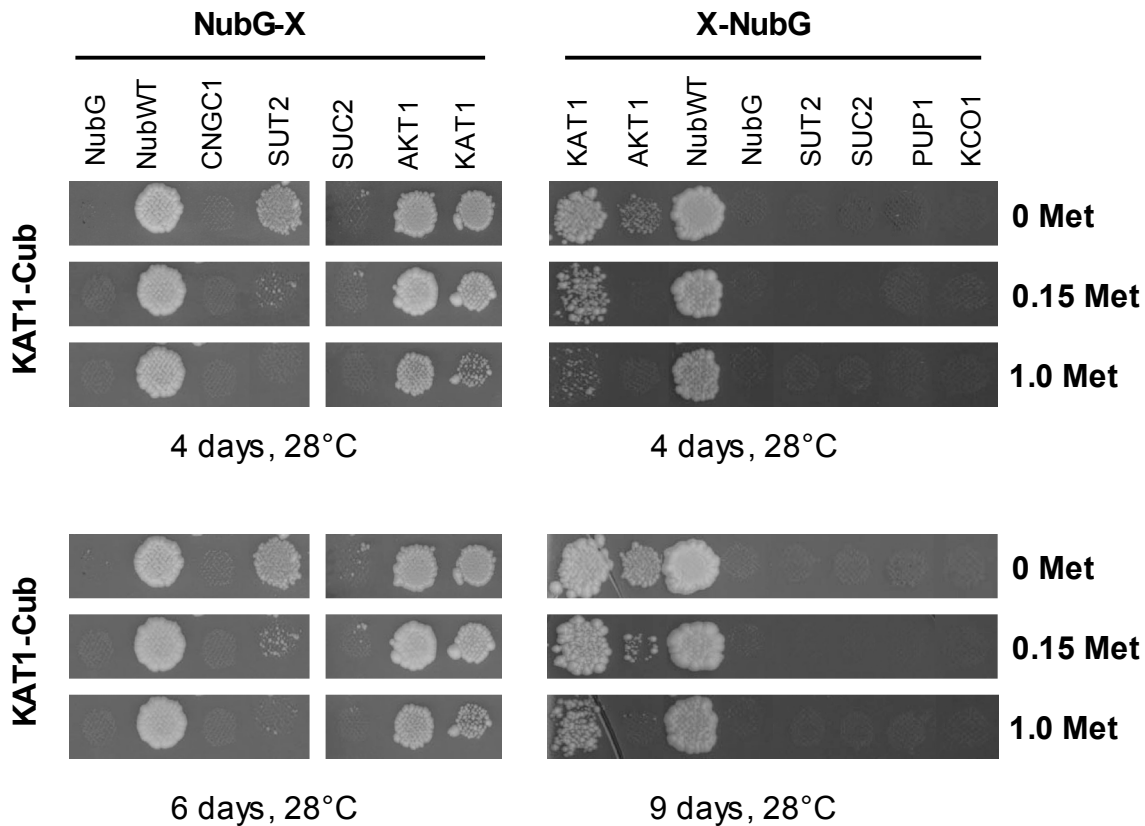

Supplement: pnas_101_33_12242__8.pdf [file pnas_101_33_12242__8.pdf]
